# Supplementary material for: Exploring spatial patterns and hotspots of diarrhea in Chiang Mai, Thailand
Source: Springer Nature journal article supplement (doi:10.1186/1476-072x-8-36), 2009-01-01

*Data Acquisition*

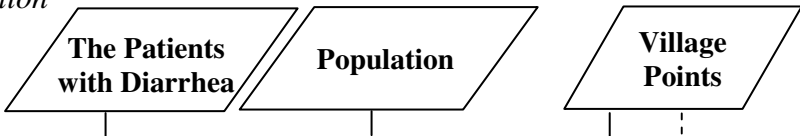

*Data Preparation*

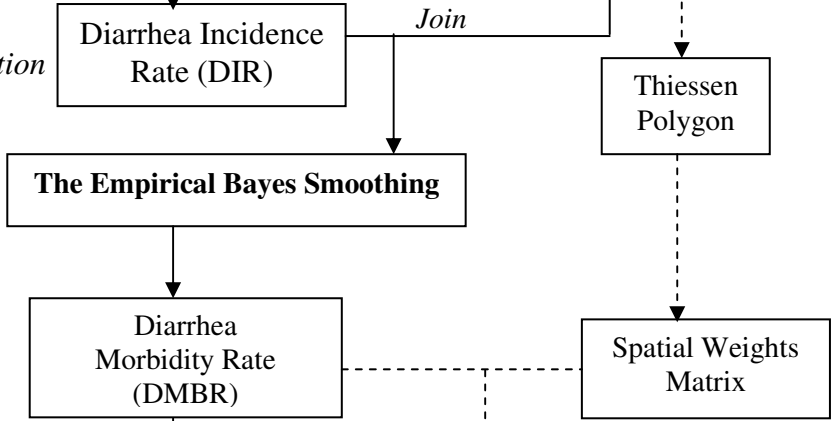

*Data Analysis*

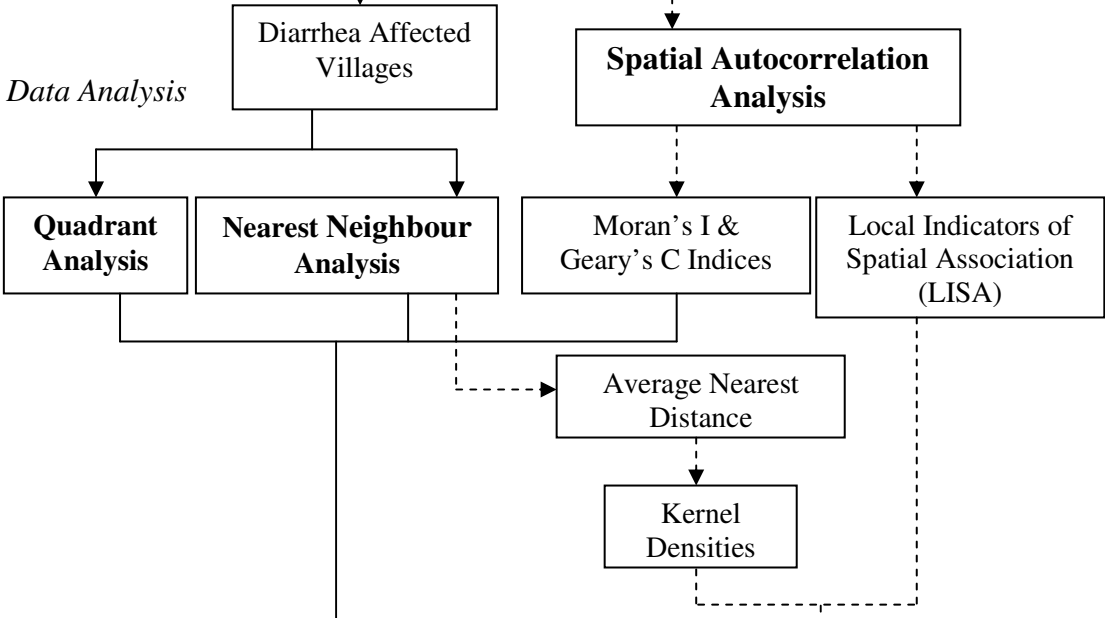

*Result*

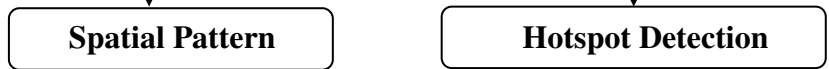

Supplement: 12942_2009_297_MOESM2_ESM.pdf [file 12942_2009_297_MOESM2_ESM.pdf]
