# Supplementary material for: Exploring spatial patterns and hotspots of diarrhea in Chiang Mai, Thailand
Source: Springer Nature journal article supplement (doi:10.1186/1476-072x-8-36), 2009-01-01

2001

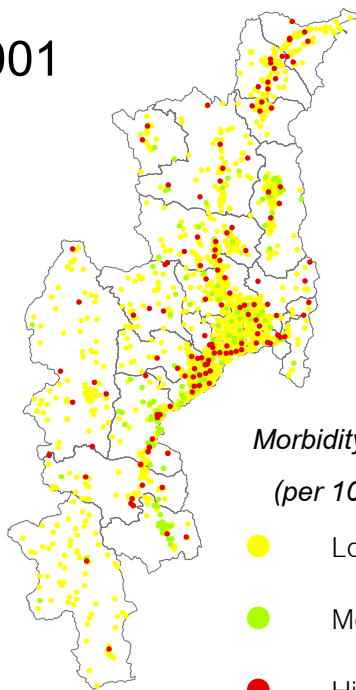

*Morbidity rate*  
(per 1000)

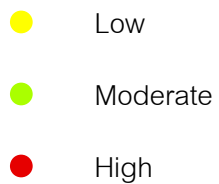

2002

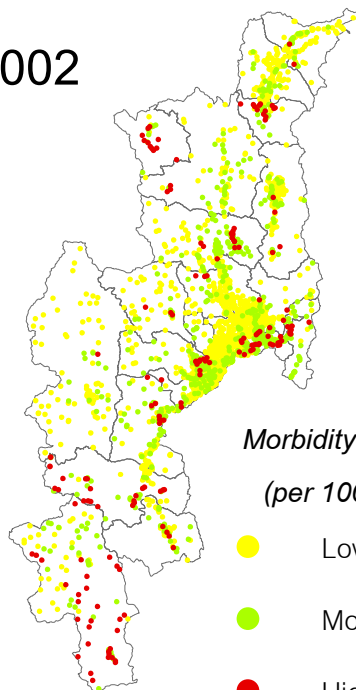

*Morbidity rate*  
(per 1000)

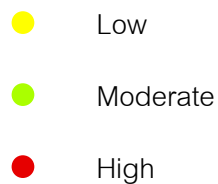

2003

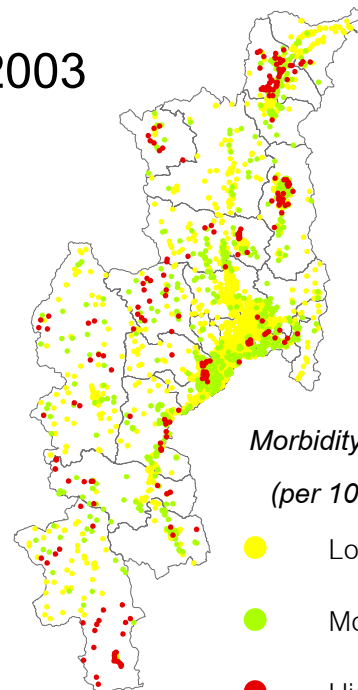

*Morbidity rate*  
(per 1000)

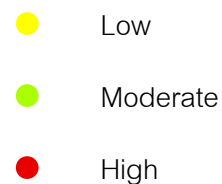

2004

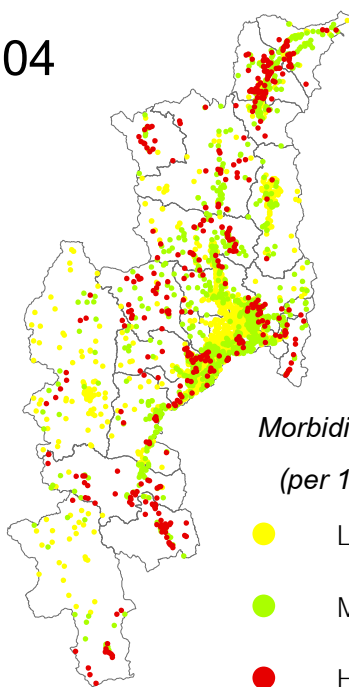

*Morbidity rate*  
(per 1000)

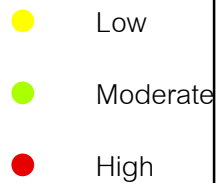

2005

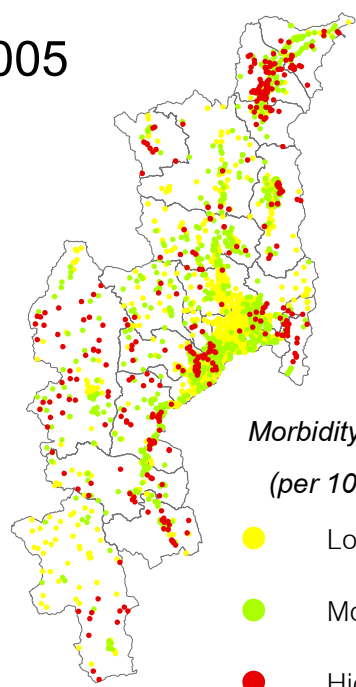

*Morbidity rate*  
(per 1000)

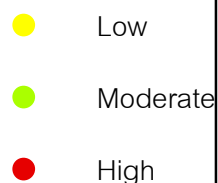

2006

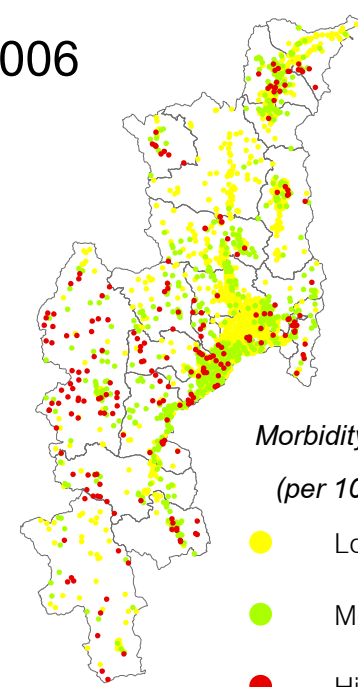

*Morbidity rate*  
(per 1000)

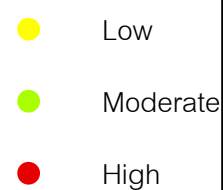

Supplement: 12942_2009_297_MOESM4_ESM.pdf [file 12942_2009_297_MOESM4_ESM.pdf]
