# Supplementary material for: Exploring spatial patterns and hotspots of diarrhea in Chiang Mai, Thailand
Source: Springer Nature journal article supplement (doi:10.1186/1476-072x-8-36), 2009-01-01

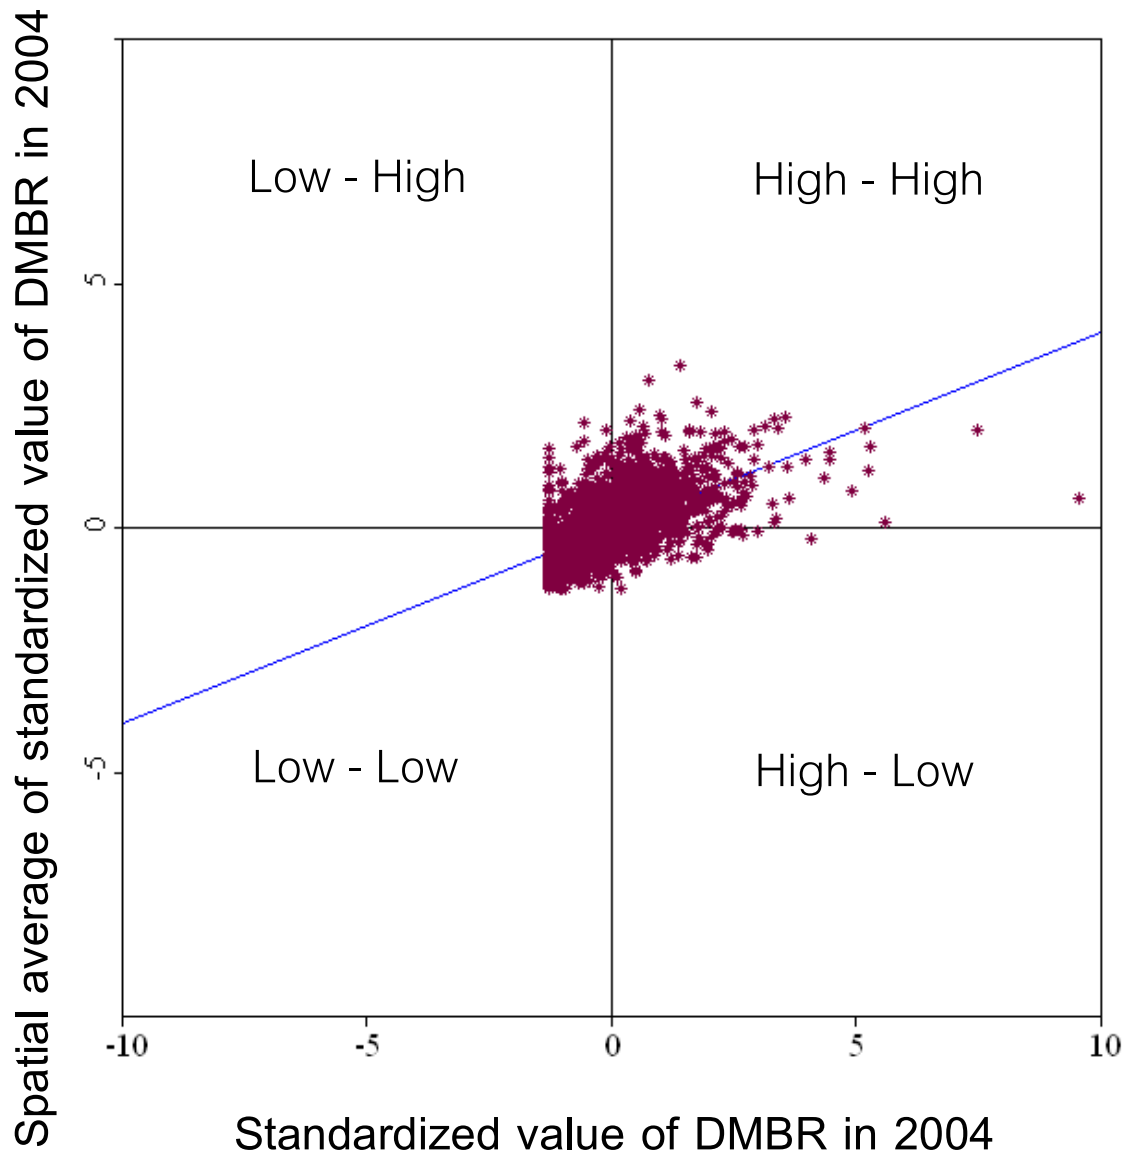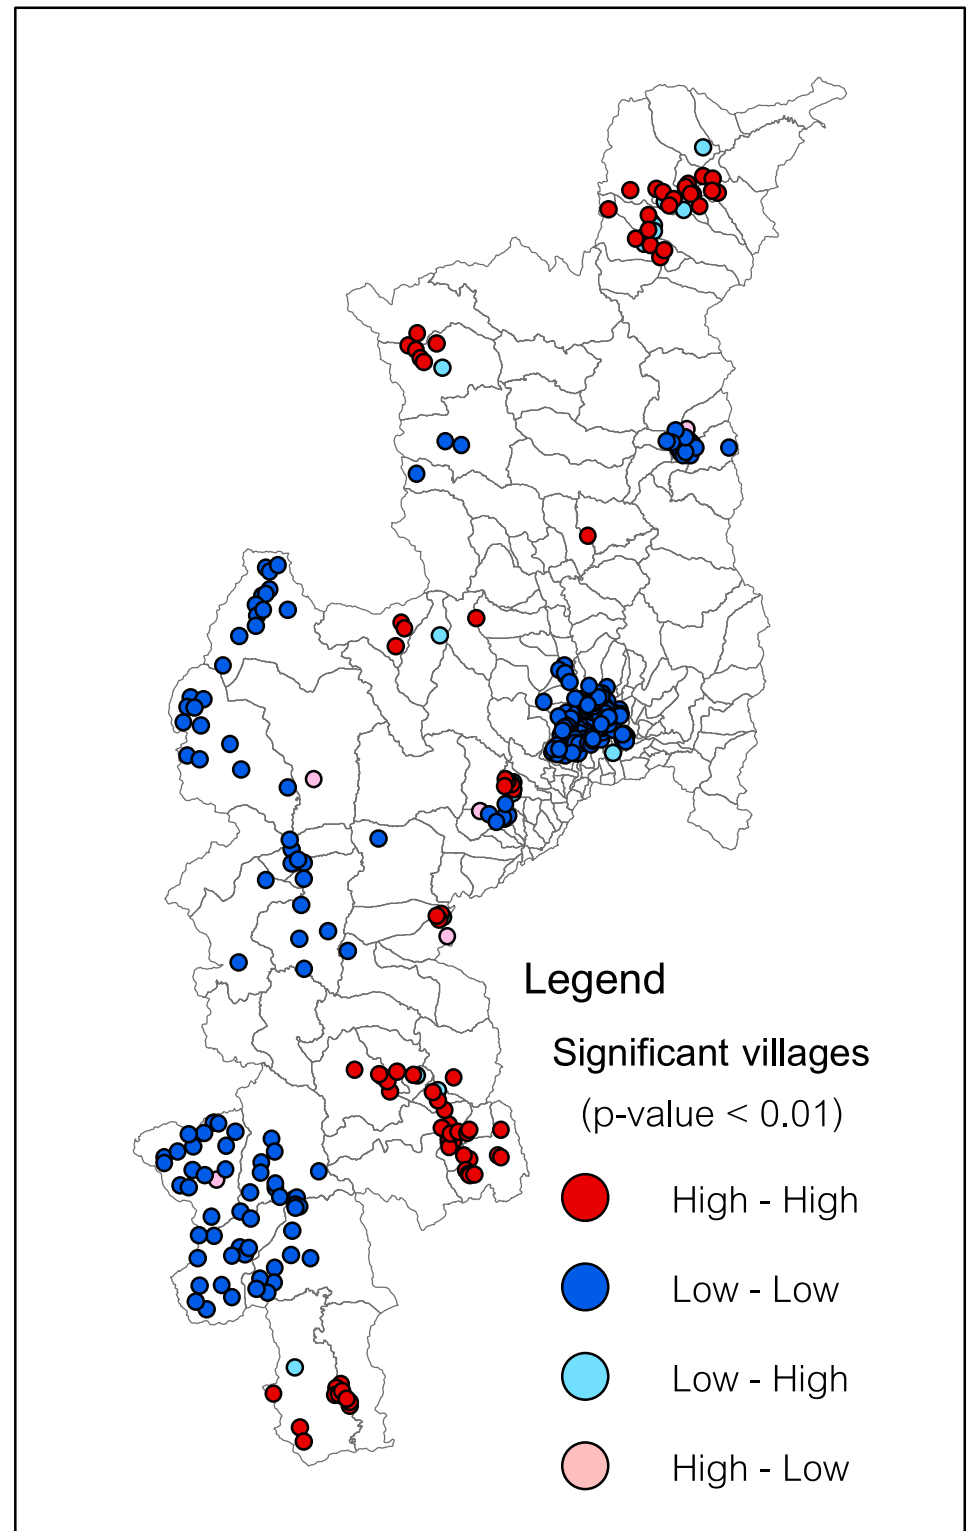

Supplement: 12942_2009_297_MOESM5_ESM.pdf [file 12942_2009_297_MOESM5_ESM.pdf]
